# Supplementary material
Source: MDPI journal article supplement (https://www.mdpi.com/2073-4441/14/17/2748)
Supplement: s1 [file s1]

## SUPPLEMENTARY MATERIAL

### S1. Weather for the monitoring period

The values for the main weather parameters (mean air temperature, total precipitation, rain), together with average values for measured SWC for various averaging intervals during the period covered by this study (2010 – 2019) are shown in Table S1 and Table S2.

**Table S1.** Values for measured mean air temperature (T), total precipitation (TP), rain and soil water content (SWC) based on daily data for the study period (2010 – 2019)

|                        | All crops     |            |              |            | Potatoes      |            |              |            |
|------------------------|---------------|------------|--------------|------------|---------------|------------|--------------|------------|
|                        | Air T<br>(°C) | TP<br>(mm) | Rain<br>(mm) | SWC<br>(%) | Air T<br>(°C) | TP<br>(mm) | Rain<br>(mm) | SWC<br>(%) |
| <b>Average</b>         | 6.2           | 1231.3     | 956.9        | 26.9       | 6.4           | 1305.7     | 1034.0       | 27.4       |
| <b>GS<sup>1</sup></b>  | 15.3          | 514.8      | 513.7        | 23.8       | 15.4          | 513.0      | 511.4        | 23.6       |
| <b>OGS<sup>1</sup></b> | -0.8          | 716.6      | 443.1        | 29.3       | -0.6          | 792.6      | 522.6        | 30.3       |
| <b>Spring</b>          | 3.1           | 256.9      | 194.6        | 28.8       | 2.8           | 285.1      | 220.9        | 30.0       |
| <b>Summer</b>          | 17.7          | 261.3      | 261.1        | 22.9       | 17.4          | 272.8      | 272.8        | 23.3       |
| <b>Fall</b>            | 9.2           | 373.9      | 348.3        | 26.1       | 9.8           | 367.7      | 335.4        | 25.6       |
| <b>Winter</b>          | -5.2          | 339.2      | 152.9        | 29.7       | -4.8          | 380.1      | 204.9        | 30.8       |
| <b>Jan</b>             | -6.4          | 86.8       | 34.2         | 29.7       | -5.9          | 102.4      | 48.7         | 31.3       |
| <b>Feb</b>             | -6.8          | 113.3      | 31.8         | 29.8       | -6.7          | 128.6      | 32.9         | 31.6       |
| <b>Mar</b>             | -3.1          | 80.1       | 34.3         | 29.7       | -4.3          | 86.0       | 39.3         | 31.7       |
| <b>Apr</b>             | 3.1           | 94.2       | 78.5         | 29.8       | 3.7           | 81.6       | 66.5         | 31.2       |
| <b>May</b>             | 9.3           | 82.6       | 81.7         | 26.9       | 9.1           | 117.5      | 115.1        | 27.1       |
| <b>Jun</b>             | 14.0          | 94.3       | 94.2         | 24.9       | 14.3          | 74.6       | 74.6         | 24.3       |
| <b>Jul</b>             | 19.4          | 58.4       | 58.4         | 22.3       | 19.5          | 80.5       | 80.5         | 22.8       |
| <b>Aug</b>             | 19.4          | 108.5      | 108.5        | 21.6       | 18.5          | 117.6      | 117.6        | 22.8       |
| <b>Sep</b>             | 15.1          | 113.5      | 113.5        | 23.8       | 15.1          | 71.4       | 71.4         | 22.6       |
| <b>Oct</b>             | 9.3           | 131.0      | 130.1        | 26.2       | 10.7          | 155.3      | 153.6        | 25.5       |
| <b>Nov</b>             | 3.1           | 129.4      | 104.7        | 28.4       | 3.4           | 141.0      | 110.5        | 28.7       |
| <b>Dec</b>             | -2.6          | 139.1      | 86.8         | 29.7       | -1.9          | 149.2      | 123.3        | 29.4       |

<sup>1</sup>GS: Growing season (May 25<sup>th</sup> – October 30<sup>th</sup>; 159 days); OGS – Outside of the Growing Season (October 31<sup>st</sup> to May 24<sup>th</sup> of the next year)

**Table S2.** Annual averages for measured mean air temperature (T), total precipitation (TP), rain and soil water content (SWC), based on daily data for the study period (2010 – 2019)

| Year              | Rotation phase            | Air T (°C) | TP (mm) | Rain (mm) | SWC (%) |
|-------------------|---------------------------|------------|---------|-----------|---------|
| 2010 <sup>1</sup> | Clover                    | 11.4       | 857.8   | 803.6     | 29.1    |
| 2011              | Potato                    | 6.7        | 1370.1  | 1081.0    | 28.1    |
| 2012              | Barley                    | 7.3        | 1078.6  | 847.0     | 25.3    |
| 2013              | Clover                    | 6.0        | 1158.8  | 912.6     | 25.5    |
| 2014              | Potato                    | 6.0        | 1453.9  | 1154.5    | 27.2    |
| 2015              | Barley                    | 5.4        | 1401.5  | 892.7     | 27.7    |
| 2016              | Barley                    | 6.6        | 1096.1  | 823.7     | 27.5    |
| 2017              | Potato                    | 6.5        | 1093.0  | 866.4     | 26.8    |
| 2018              | Barley                    | 6.0        | 1203.4  | 976.8     | 26.7    |
| 2019              | Clover mixed with grasses | 5.7        | 1226.9  | 1057.0    | 27.1    |

<sup>1</sup>incomplete year (data starting in July 2010)

Annual average precipitation for the period of the study (2010-2019) varied between 1079 and 1453 mm with an average of 1230 mm (Table S1), including 275 mm falling as snow. The multi-year monthly averages (Table S2) show that 41.8% of the total precipitation occurs during the growing season (GS), indicating a slightly skewed distribution of precipitation during the year (i.e., 3.3 mm/d during GS vs. 3.5 mm/d during OGS). The first half of the GS (May – July) showed lower total precipitation monthly values than the multi-year monthly average, with the average for July ~46 mm below the total precipitation monthly average (i.e., 58 mm vs 103). The reduced amount of precipitation for July, in conjunction with the maximum monthly air temperature and crop evapotranspiration for July and August, are the driving factors for the SWC, which also reached its minimum during this period. The monthly precipitation recorded for each month of the studied period, showed high variability from year to year (Figure S1), however, it should be noted that the variability during the first half of the GSs was relatively low compared to other periods of the year (i.e. standard deviation of 45.8, 35.8 and 35.0 compared to a multi-year monthly standard deviation average of 45.1).

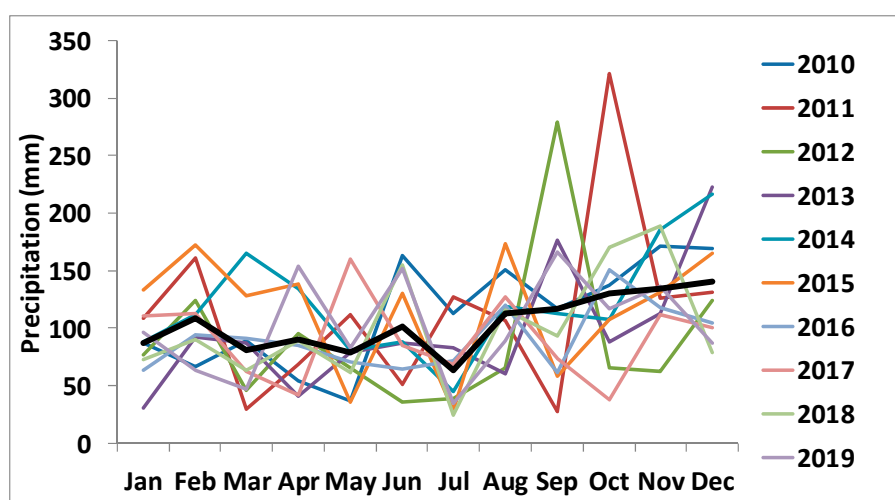

**Figure S1.** Monthly total precipitation amounts for each of the study years (black line - multi-year monthly average)

## **S2. Supplemental irrigation requirement for each year of the monitoring period (2010 – 2019)**

**Table S3.** Supplemental irrigation requirement (mm<sup>1</sup>) for the various irrigation levels and efficiency scenarios for each GS during the monitoring period

| Irrigation scenario   |        | SWC=0.9FC |      |      |      | SWC=0.8FC |      |      |      | SWC=0.7FC |      |      |      |
|-----------------------|--------|-----------|------|------|------|-----------|------|------|------|-----------|------|------|------|
| Irrigation efficiency |        | 100 %     | 90 % | 55 % | 20%  | 100 %     | 90 % | 55 % | 20 % | 100 %     | 90 % | 55 % | 20 % |
| Year                  | SWC(%) |           |      |      |      |           |      |      |      |           |      |      |      |
| 2011                  | 23.0   | 303       | 337  | 551  | 1514 | 135       | 151  | 246  | 677  | 19        | 21   | 35   | 96   |
| 2014                  | 24.4   | 126       | 139  | 228  | 628  | 57        | 63   | 103  | 283  | 19        | 22   | 35   | 97   |
| 2017                  | 23.5   | 140       | 156  | 255  | 702  | 63        | 71   | 115  | 317  | 12        | 14   | 22   | 61   |
| Average               | 23.6   | 190       | 211  | 345  | 948  | 85        | 95   | 155  | 426  | 17        | 19   | 31   | 85   |

<sup>1</sup>the volume of water in m<sup>3</sup> ha<sup>-1</sup> can be obtained by multiplying the values in the table by 10

**Table S4.** Supplemental irrigation requirement (mm<sup>1</sup>) for the various irrigation levels and efficiency scenarios during tuber initiation and bulking stages of each growing season during the monitoring period

| Irrigation scenario   |        | SWC=0.9FC |      |      |      | SWC=0.8FC |      |      |      | SWC=0.7FC |      |      |      |
|-----------------------|--------|-----------|------|------|------|-----------|------|------|------|-----------|------|------|------|
| Irrigation efficiency |        | 100 %     | 90 % | 55 % | 20 % | 100 %     | 90 % | 55 % | 20 % | 100 %     | 90 % | 55 % | 20 % |
| Year                  | SWC(%) |           |      |      |      |           |      |      |      |           |      |      |      |
| 2011                  | 22.1   | 195       | 217  | 354  | 975  | 112       | 125  | 204  | 562  | 11        | 12   | 20   | 54   |
| 2014                  | 23.7   | 85        | 95   | 155  | 426  | 30        | 33   | 55   | 150  | 2         | 2    | 3    | 9    |
| 2017                  | 22.5   | 92        | 103  | 168  | 462  | 52        | 57   | 94   | 258  | 12        | 14   | 22   | 61   |
| Average               | 22.8   | 124       | 138  | 226  | 621  | 65        | 72   | 118  | 323  | 8         | 9    | 15   | 41   |

<sup>1</sup>the volume of water in m<sup>3</sup> ha<sup>-1</sup> can be obtained by multiplying the values in the table by 10

## **S3. Average supplemental irrigation requirement for various extents of irrigated areas**

Table S5 and Table S6 show the estimated total volume of water required (m<sup>3</sup>) and the comparison between irrigation supply requirement and aquifer annual recharge for various areal extents of irrigated land on a given area. The annual groundwater recharge was considered to be 400 mm (4000 m<sup>3</sup> ha<sup>-1</sup>). The reference area used for calculating the volume of irrigation water required the equivalent volume of recharge and the significance of irrigation water as percentage of annual groundwater recharge was 1 ha. In order to calculate the equivalent volume of water required for irrigation for an area of a different size, the values (i.e., volume of water and/or recharge) in the two tables below have to be multiplied by the respective area.

**Table S5.** Volume of irrigation water required (m<sup>3</sup>) during the average growing season for various areal extents of irrigated land

| Extent of irrigated land (%) | Extensive irrigation (0.9FC) |                    |                    | Moderate irrigation (0.8FC) |                    |                    | Minimal irrigation (0.7FC) |                    |                    |
|------------------------------|------------------------------|--------------------|--------------------|-----------------------------|--------------------|--------------------|----------------------------|--------------------|--------------------|
|                              | 90%<br><i>eff.</i>           | 55%<br><i>eff.</i> | 20%<br><i>eff.</i> | 90%<br><i>eff.</i>          | 55%<br><i>eff.</i> | 20%<br><i>eff.</i> | 90%<br><i>eff.</i>         | 55%<br><i>eff.</i> | 20%<br><i>eff.</i> |
| <b>25</b>                    | 527                          | 862                | 2370               | 237                         | 387                | 1065               | 47                         | 77                 | 212                |
| <b>50</b>                    | 1053                         | 1724               | 4740               | 473                         | 774                | 2129               | 94                         | 154                | 424                |
| <b>75</b>                    | 1580                         | 2585               | 7110               | 710                         | 1161               | 3194               | 141                        | 231                | 636                |
| <b>100</b>                   | 2107                         | 3447               | 9480               | 946                         | 1549               | 4259               | 188                        | 308                | 848                |

**Table S6.** Comparison between the volume of irrigation water required during the growing season and the annual groundwater recharge for various areal extents of irrigated land

| Extent of irrigated land (%) | Extensive irrigation (0.9FC) |                    |                    | Moderate irrigation (0.8FC) |                    |                    | Minimal irrigation (0.7FC) |                    |                    |
|------------------------------|------------------------------|--------------------|--------------------|-----------------------------|--------------------|--------------------|----------------------------|--------------------|--------------------|
|                              | 90%<br><i>eff.</i>           | 55%<br><i>eff.</i> | 20%<br><i>eff.</i> | 90%<br><i>eff.</i>          | 55%<br><i>eff.</i> | 20%<br><i>eff.</i> | 90%<br><i>eff.</i>         | 55%<br><i>eff.</i> | 20%<br><i>eff.</i> |
| <b>25</b>                    | 345                          | 564                | 1552               | 180                         | 294                | 809                | 23                         | 37                 | 103                |
| <b>50</b>                    | 690                          | 1128               | 3103               | 359                         | 588                | 1617               | 46                         | 75                 | 206                |
| <b>75</b>                    | 1034                         | 1693               | 4655               | 539                         | 882                | 2426               | 69                         | 112                | 309                |
| <b>100</b>                   | 1379                         | 2257               | 6207               | 719                         | 1176               | 3235               | 92                         | 150                | 412                |
